# Supplementary material for: 25 years of seismology at school in France
Source: Copernicus journal article supplement (doi:10.5194/gc-2020-32), 2020-08-20
Supplement: Supplementary file [file gc-2020-32-RC1-supplement.pdf]

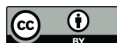

1

2 **25 years of seismology at school in France**

3

4 Jean-Luc Berenguer<sup>1\*</sup>, Julien Balestra<sup>1</sup>, Fabrice Jouffray<sup>1</sup>, Fabrice Mourauz, Françoise  
5 Courboulex<sup>1</sup>, and Jean Virieux<sup>3</sup>

6 <sup>1</sup> Université Côte d'Azur, CNRS, IRD, Observatoire de la Côte d'Azur, Géoazur, Valbonne,  
7 France

8 <sup>2</sup> Pierre de Coubertin School, Le Luc en Provence, France

9 <sup>3</sup> Université Grenoble Alpes, CNRS, IRD, IFSTTAR, ISTerre, Grenoble, France

10

11 **\*Correspondence:**

12 Jean-Luc BERENGUER

13 jean-luc.berenguer@univ-cotedazur.fr

14 **Keywords: education, seismology, hazard, school, teaching, database**

15 **Abstract (257 words)**

16

17 An educational program focusing on seismological activities for students' training in  
18 observational sciences and on raising citizen awareness of natural hazards has been active in  
19 France since 1995. Over this quarter century, different generations of students have learnt  
20 various lessons concerning instrument installation, data recording and analysis. These actions  
21 have led them into the field of scientific interrogation and interpretation, making them better  
22 prepared for our modern technological societies. We describe these student commitments  
23 motivated by the installation of the first educational broadband seismometer in southern France.  
24 Analysis of regional earthquakes has generated a strong awareness of the seismic hazard where  
25 students live, while records of strong earthquakes all around the world have induced interaction  
26 between students, especially after the deployment of additional seismometers at schools. The  
27 natural extension of such an educational seismic network, first at the national level in France in  
28 2006 and later in many countries through various collaborations, has enriched the pedagogical  
29 practices of teachers, increasing their skills in seismology and natural sciences among various  
30 other disciplines and implementing standard educational resources. We describe the necessary and  
31 sustainable relations between teachers and researchers over time. Combining students'  
32 motivation, teachers' experience and researchers' expertise has led to different hosting

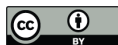

33 structures over the years. We conclude by presenting the feedback from a survey carried out in  
34 2019 among all the teachers involved, highlighting the strong and weak points of such a long-  
35 term adventure. Recent integration into the official syllabus of the new Geosciences high-school  
36 curricula in France illustrates the impact of such an exceptional experience.

37

## 38 **Introduction**

39

40 Earthquakes occur suddenly and cause terrible damage to the infrastructures of our modern  
41 societies, leading to high numbers of casualties. These events are unavoidable but their impact  
42 can be significantly mitigated. They remain unpredictable with our current scientific  
43 knowledge. Moreover, they provoke trouble and fascination in our minds.

44 This is why emphasis must be placed on awareness, especially in the school system where the  
45 causes and effects of these hazards are studied. The idea of an educational seismic network  
46 arose in the United States with the Princeton Earth Physics Project proposed by Pr. G. Nolet  
47 and Pr. B. Phinney in 1993 (PEPP, Steinberg et al., 2000). Pursuing the same objective, an  
48 educational seismic network was initiated in France in 1995 and is still active after twenty-five  
49 years.

50 Today, many other educational seismic networks exist around the world, including the United  
51 States, Great Britain, Greece, Portugal, Australia, Nepal, Taiwan, Haiti and so on (Liang et al.,  
52 2016), providing an indication of the importance and need for installing seismic sensors to  
53 schools for educational purposes. The installation of seismometers at schools promotes learning  
54 based on original records. Such learning makes students familiar with scientific data. With  
55 acquired experience, students can download other data from environmental agencies for their  
56 own investigations. It also provides for the collaboration between teachers and researchers to better  
57 collect and analyze the seismic data. Such interaction allows teachers to develop teaching  
58 material in class. Moreover, this teaching material is provided on a website to other educators  
59 within the same discipline. It has been observed that these online resources have been used by  
60 a broader community of teachers in many fields, including natural sciences, history, geography,  
61 social sciences and so on.

62 Through this unique, long-term experience, this paper contributes to answering the following  
63 questions. How and why has the French educational system evolved over time and benefited  
64 from the deployment of a dedicated seismic network? Why is collecting scientific data inside a  
65 school important for both teachers and students? How have motivated teachers been able to  
66 elaborate online educational exercises to study their own data as well as the data that has  
67 become increasingly available on the web? How have such original educational resources been  
68 shared with other teachers across school and national boundaries? What skills and supports are  
69 needed to maintain an active educational network? Why can we not rely only on the open  
70 datasets available on the web? How has such an experience impacted French teaching  
71 programs?

72

## 73 **“Sismo des écoles”: the first French school network**

74

75 In 1995, thanks to the PEPP initiative, the design of a dedicated educational seismometer began  
76 in France: a broadband 3-component velocimeter associated with a 24-bit high-dynamic

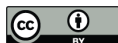

77 digitizer synchronized by GPS with a precision of 1 msec (Fig. 1a). It was installed at the  
78 International Campus of Valbonne (CIV, pilot school). This sensor and its control card were  
79 monitored via a personal computer and a telephone line. In order to share scientific information  
80 between schools, the automatic nightly gathering of time-windowed records of local, regional,  
81 and long-distance events, when strong enough, was elaborated from the earthquake catalogs of  
82 international agencies. At that time, seismic sensors and related seismograms were more or less  
83 an abstraction for the school community. The first active group of 12 high school students was  
84 created, meeting weekly to share the analyses of seismograms from the station and related  
85 information collected through newspapers. This very committed group was supervised by a  
86 teacher in close interaction with a researcher, both involved in this prototype project at the CIV.  
87 For the very first time, students had immediate access to global earthquake seismicity from the  
88 seismometer within their school. The seismometer and its records provided some concrete  
89 aspects to virtual questions related to seismic hazard and to the knowledge of the Earth's  
90 structure, which are key scientific topics for French high school educational programs. Students  
91 and teachers tracked seismic events, such as the Chi Chi earthquake (Fig. 1b), as well as other  
92 natural or anthropogenic vibrations (well, human activity, quarry blasts, etc.).  
93 In 1996, the French Ministry of Education decided to connect all the schools to the Internet for  
94 student training. However, these institutions were very concerned about the added pedagogical  
95 value of the Internet in schools. The seismic network thus benefited from this evolution in  
96 connectivity: the prototype seismometer was connected to the Internet network. The first online  
97 educational seismic database was born. Teachers in other schools were able to work on the  
98 online seismic datasets. At the same time, regional political concerns focused on the education  
99 of young people about natural hazard awareness in one of the most active seismic zones in  
100 France. The prototype station demonstrated that an in-school seismic network to promote  
101 educational programs was possible: a first local financial contribution of the "Alpes Maritimes"  
102 region was granted. A network of five schools equipped with three-component broadband  
103 sensors was set up in the south of France (regional deployment in Fig. 1c, Virieux et al., 2000)  
104 and proved to be so successful that the extension to a national configuration was envisioned.  
105 The organization of such a network was based on voluntary proposals from a team of teachers.  
106 The equipment was provided free of charge while maintenance was the responsibility of the  
107 volunteer school.

108

109 **An increasing network of teachers specialized in seismology**

110



111 This network, which is constantly increasing, has been supported by different regional and  
112 national funds. In 2006, the French national “Sciences à l’École” organization integrated the  
113 existing “Sismo des écoles” network into their national educational projects. This cooperation  
114 enabled the transformation of local actions into widespread initiatives. The network, renamed  
115 “SISMOS à l’École”, was first deployed on a national level, followed by international  
116 deployment in the French schools abroad. This figure shows the part of  
117 professional and educational sensors. See “Data and Resources” for more details. In order to  
118 fulfill the educational target of seismic hazard education and scientific approaches, having  
119 teachers who are well-trained in seismological skills as an interface between teachers and  
120 researchers is mandatory and requires specific workshops. Each school with an installed sensor  
121 has an identified researcher (one teacher - one researcher as a mentor). Researchers have  
122 comprehensive knowledge of seismic phenomena and teachers have the pedagogical skills to  
123 describe these phenomena to students. Researchers have also contributed to the numerous  
124 training sessions through scientific refresher lectures. Furthermore, the researchers also use the  
125 network’s datasets to integrate them into the seismicity study of the considered areas (Berenguer  
126 et al., 2013; their figure 6).

127

### 128 *Regional, national, and international teachers’ workshops*

129

130 In the last 25 years, different meetings have been proposed to any teacher who wants to increase  
131 their own skills in seismological topics. In order to maintain significant momentum within the  
132 national (and overseas) network, six national meetings have been held since the beginning of  
133 the project, with a total of 200 teachers attending at least one of the proposed meetings. These  
134 ongoing training sessions thus keep the educational network alive. Topics are related to  
135 following items:

- 136 - scientific conferences presented by scientists and specialized teachers,
- 137 - practical workshops around datasets from the network,
- 138 - poster presentations to share experiences at different schools.

139 This format was finally recognized as very useful and helpful for the optimal use of scientific  
140 datasets, through the interaction of researchers participating in these teachers’ workshops and  
141 with the participation of the young students whose awareness has been raised. At a different  
142 scale, European teachers’ workshops were organized under the umbrella of European research  
143 projects, such as the NERA, O3E, and SERA projects (see “Acknowledgements”). These  
144 workshops, supported financially by these European projects, have provided the opportunity to



145 mix the different cultural styles of educational training one can find among the different  
146 European countries.

147

148 *A long-standing production of teaching resources*

149

150 At the early stage of the network, the teachers shared their pedagogical experiences of  
151 exploiting in-school seismometers and available datasets on the web. Initial activities focused  
152 on the interpretation of dates, travel times and p  of seismic waves. With the accumulation  
153 of new data combined with their increasing seismological s  teachers started to produce  
154 better-developed activities focusing on different and more complex aspects. The development  
155 of digital tools at school has enabled the development of original activities to manipulate  
156 numerical quantities. For example, by combining information from seismic catalogs and  
157 spreadsheet tools, students are able to display coordinates of listed seismic events on a map and  
158 observe that the distribution of each plot enables them to highlight areas which look like  
159 tectonic plates. Manipulating these catalogs by themselves enhances their understanding of  
160 where and how the information is obtained, which is an added value with respect to push-button  
161 applications. An extensive collection of different shared activities was undertaken and finalized  
162 through an exercise book: “Le cahier d’activités du SISMO” (the seismo hands-on book,  
163 Berenguer et al., 2009, Fig. 2a, see “Data and Resources”). This collection is an illustration of  
164 what can be done with the help of seismic data collected in schools. Quite sophisticated  
165 scientific topics may be tackled in a simple and pragmatic way during teaching and training.  
166 We can cite an example of a practical activity that has become very popular in the classroom.  
167 The experiment consists in causing the rupture of a rigid material (polystyrene, uncooked  
168 lasagna sheets, hard chocolate, etc.), and recording, with the help of simple piezoelectric cells,  
169 the waves that propagate around the rupture (Le cahier d’activités du SISMOS, pp.24-25). More  
170 activities are available in the digital version available on line (see “Data and Resources”).

171 *Successive web platforms to improve sharing*

172

173 All records and activities have also centralized on successive dedicated web platforms for open  
174 sharing. At the origin of the project, a web server was hosted by the regional services of the  
175 French Ministry of Education. Thus, the records from regional and global seismic activity feed  
176 an online database and constitute a seismic resource center for education. Teaching requires a  
177 didactic approach to resources. The need for a more sophisticated platform emerged: this is why  
178 the web interface of our educational program goes beyond a simple data center. In 2010, the



179 “[www.edusismo.org](http://www.edusismo.org)” website was developed through funds provided by the French ministerial  
180 “Sciences à l’École” program. This website was a cornerstone  provide tools (experiments,  
181 software, and simulation) to properly exploit the available datasets as well as many different  
182 educational paths. The two first main digital tools used were:

- 183 - SeisGram2K (Lomax A., 2000, see “Data and Resources”) software, an interface for  
184 the seismological research community and adapted for schools. Students can display  
185 seismograms, apply filtering processes,  arrival times, and more;
- 186 - EduCarte geographical information software (see “Data and Resources”) which  
187 enables users to plot geo-referenced information, work with seismograms, display GPS  
188 measurements, create cross sections, and more.

189 Making these datasets didactic through simple and well-developed working steps remains the  
190 priority of our program.

191

### 192 **New impetus for natural risk prevention with the EduMed Observatory**

193 Since  2017, University Côte d’Azur has taken over with the program called Educational  
194 Mediterranean Observatory (“EduMed-Obs”, <http://edumed.unice.fr>). EduMed-Obs focuses on  
195 implementing an interface based on a geoscience dataset concerning the Mediterranean basin.  
196 The theme not only focuses on seismology: landslides, meteorology, hydrology, and sea-level  
197 variations are also considered. Data mining is developing and  become preponderant in current  
198 teaching programs (Bigot-Cormier et al., 2017). These datasets are intended not only for middle  
199 and high schools, but also for university students. EduMed-Obs also provides datasets from  
200 research centers. This aspect is important  strengthen the visibility of the activities of research  
201 institutes. It is an excellent opportunity for students to compare datasets from their own sensors  
202 with research datasets. Making populations aware, through student training, of the role of earth  
203 science observatories is crucial and promotes a better understanding of the seismological (and  
204 environmental) nature of the territory where students live. How these observatories participate  
205 in our seismic risk awareness is better understood by political structures, inducing improved  
206 territorial management, such as tsunami mitigation. This new educational observatory already  
207 numbers some seventy European schools in the countries around the Mediterranean that host  
208 sensors and which implement scientific teaching focused on natural risk education (schools map  
209 available at <http://edumed.unice.fr/fr/le-reseau-edumed>). The schools that are twinned within  
210 this network can share their experience on natural risks along the Mediterranean coast.  
211 EduMed-Obs is a partner of many innovative field camp training courses organized around the



212 Mediterranean, like “InsegnaciEtna 2019” in Sicily (<http://site.ietna.eu>). This expertise is  
213 already being exported through initiatives in Central America, where a network is being built  
214 on the Caribbean arc from Haiti to Venezuela via the French West Indies  
215 (<http://edumed.unice.fr/fr/eduseis>). The recent creation of EduMed-Obs as well as its present  
216 and future actions are directly inspired by the feedback from the teachers involved in this project  
217 over the past 25 years. Below, we propose a description of the key points mentioned by the  
218 teachers over the years.

### 219 **A look at the past actions of the French educational seismological network**

220

221 Teachers have reported a number of positive points from their experience: students' enthusiasm  
222 for recording quakes, the ease of understanding online databases, the development of autonomy,  
223 students' responsibility in managing a seismological station, the importance of natural risk  
224 within the theme of sustainable development. One of the great strengths of the network has  
225 been its integration into teaching programs, and to fulfill various expected educational  
226 objectives:

- 227 - practice a scientific approach;
- 228 - demonstrate observation skills, curiosity, critical thinking;
- 229 - experience autonomy;
- 230 - communicate in scientifically appropriate language: oral, written, graphical, numerical.

231 The installation of seismometers in schools in different areas of Europe and abroad has given  
232 the necessary impulse to use a scientific approach for the improved development of activities  
233 concerning the knowledge of hazard, the real-time manipulation of information and scientific  
234 databases, as well as a better understanding of matters related to risk and territorial management  
235 (Courboulex et al., 2012). However, it remains important to evaluate how this program has  
236 spread scientific culture and risk education to generations of students.

237

#### 238 *The “25 years of the French seismology at school” survey*

239

240 After 25 years, the time had come to make an overview of the teachers' vision of the impact of  
241 this network on their teaching and on student training. A survey was conducted in November  
242 2019 among all teachers who have participated in the various actions of the program since its  
243 beginning. Note that these teachers are all teachers who are, or who were, the school reference  
244 person for the seismometer installed in one of the 105 schools of the network. Several of them



245 are (or were) in charge of teacher training sessions in France and abroad. The number of  
246 responses may seem small, but their answers reflect the feeling of many more people. Collecting  
247 all feelings, reflections and suggestions accumulated within the different special events carried  
248 out by the network should provide critical information for the future evolution of the  
249 educational network. Questions (Data Sheet S1) were listed in order to really quantify the  
250 impact of the program on their teaching and on the awareness of science culture and risk  
251 education among students. The results presented in Figure 2 are based on the responses of the  
252 73% of the teams to have sent feedback, i.e a total of 250 teachers. In France, Earth science is  
253 traditionally taught by biology and geology teachers. They provided the major contribution  
254 (85% of the answers) to the survey (compared with the contribution of only 15% of physics  
255 teachers). Half of them are teachers who have participated in an educational seismology  
256 program for more than 6 years. They consist in equal numbers of middle- and high-school  
257 teachers. 80% of them (200 teachers) have participated in at least one of the training seminars  
258 on seismology and seismic risk described above. The main objective of the survey concerns the  
259 pedagogical value of installing a seismometer in a school. What is the greatest contribution of  
260 such instrument in a classroom? The following interests are listed in descending order. The  
261 program has proven to be a facilitator for:

- 262 - practical support for science education (75.3%)
- 263 - seismic risk awareness (70.1%)
- 264 - creation of a science club (68.8%)
- 265 - discovery of the world of research (66.3%)
- 266 - exchanges within a network of schools and researchers (65.6%)
- 267 - practical support for technology (58.5%)
- 268 - stimulating the interest of parents (45.5%)

269 The survey confirms that a seismometer installed in schools is an essential educational element  
270 for the majority of teachers. From teacher feedback, we also note that, through this sensor  
271 installed at the school, most of the students have acquired skills to become ambassadors for  
272 seismic risk. Indeed, teachers mentioned that many students were invited to participate in  
273 scientific events in order to present their work. It can be considered that at least 20,000 students  
274 have been able to participate in and benefit from the educational seismology program in France.  
275 Many of them are adults today, some of them have chosen a scientific career, but all are citizens  
276 who have been made aware of seismic risk by studying seismic phenomenon through the  
277 analysis of seismic data provided by educational and research seismometers.

278





279 **CONCLUSION**

280

281 All teachers agree on the fact that the presence of a seismometer at school is of great interest to  
282 fulfill the main objectives of scientific culture and seismic risk education. Many other  
283 seismological networks for educational purposes have also emerged in Europe and around the  
284 world. Such educational programs have shown a positive impact among students (Zollo et al.,  
285 2014). Educational seismological networks also draw their strength from the interaction  
286 between teachers and researchers which has occurred under various circumstances. If citizen  
287 science and educational seismology occupy such a prominent place in society today, it is  
288 because they ask for citizen commitment on important issues, such as the prevention of seismic  
289 risk and, more generally, of natural risks. Schools play a central role when addressing a young  
290 public. The place of scientific research is also essential for better mitigation of natural hazards  
291 and to better understand the anthropogenic impact on environmental systems. Therefore,  
292 through this long-standing educational program with the driving motivation of building a  
293 seismic network across different educational communities in Europe, we must definitely focus  
294 on prevention through education. Educational seismology networks do more because they  
295 encourage students to adopt a scientific approach based on observation and measurement,  
296 enabling them to understand the causes of earthquakes, the internal dynamics of the globe... and  
297 to learn how to behave.

298 Finally, the challenge of educational seismology is the improved training of our students in  
299 Earth science so that they have a better understanding of how science is constructed and how it  
300 progresses. Undoubtedly, trained citizens are better equipped to face their future with a  
301 strengthened science-citizen link, and scientific vocations are the rewards of such innovative  
302 and attractive training.

303

304

305

306

307 **Data and Resources**

308

309 The book “Le Cahier d’activités du SISMO, version 2”, funded by the Alcotra Program  
310 (European Union), was developed in 2009 and published by the School District of Nice  
311 (France). A digital version is available at the following URL:

312 - <http://namazu.unice.fr/EDUMEDOBS/seismo/seismobook-version2.zip>



313 SeisGram2K and EduCarte (developed by Anthony Lomax and Jean-Luc Berenguer) software  
314 is downloadable at the following URLs:

315 - <http://edumed.unice.fr/fr/contents/news/tools-lab/SeisGram2K>

316 - <http://edumed.unice.fr/fr/contents/news/tools-lab/EduCarte>

317 The professional seismometers deployed during the initial, regional and national phases were  
318 the S.A.G.E station with a 3-component velocimeter (Noemax 20s). During the national phase,  
319 Güralp CMG 6TD were also deployed, such as the educational Vibrato station  
320 (<https://www.staneo.fr/vibrato.php>). This device and the TC1 seismometer (Van Wijk et. Al,  
321 2013) are currently deployed (EduMed-Obs phase).

322

### 323 **Acknowledgments**

324 We are especially grateful to Guust Nolet and the reviewers for the remarks and suggestions  
325 that helped us to greatly improve this paper. The educational network and activities presented  
326 in this paper have been supported from the beginning by the French Ministry of Education. It  
327 has also been supported and funded by the French Ministerial “Sciences à l’École” project, the  
328 European NERA (Network of European Research Infrastructures for Earthquake Risk  
329 Assessment and Mitigation) and SERA (Seismology and Earthquake Engineering Research  
330 Infrastructure Alliance for Europe, Grant Agreement Number 730900) research projects, the  
331 French Géoazur laboratory, and the Université Côte d’Azur through the EduMed Observatory  
332 since 2018 (UCA-JEDI Investments in the Future project under reference number ANR-15-  
333 IDEX-01).

### 334 **References**

335 Berenguer, J.L., F. Pascucci, and H. Ferry (2009). Le cahier d’activités du SISMO,  
336 version 2, Nice, Scéren Nice, 110p.

337 Berenguer, J.L., F. Courboux, A. Tocheport, and M.P. Bouin (2013). Tuned in to the  
338 Earth ... from the school EduSismo: the French educational seismological network. Bulletin de  
339 la Société Géologique de France, January/February 2013, v. 184, p. 183-187,  
340 doi:10.2113/gssgfbull.184.1-2.183

341 Bigot-Cormier, F., and J.L. Berenguer (2017). How students Can Experience Science  
342 and Become Researchers: Tracking MERMAID Floats in the Oceans. Seismological Research  
343 Letters, Volume 88, Number 2A, doi:10.1785/0220160121



344 Courboux, F., J.L Berenguer , A. Tocheport, M.P. Bouin, E. Calais, Y. Esnault, and J.  
345 Virieux (2012). SISMOS à l'Ecole: A Worldwide Network of Realtime Seismometers in  
346 Schools. Seismological Research Letters, volume 83, number 5, September/October 2012,  
347 doi:10.1785/0220110139

348 Liang, W.-T., K. Huihsuan Chen, Y.-F. Wu, E. Yen, and C.Y. Chang (2016). Earthquake  
349 School in the Cloud: Citizen Seismologists in Taiwan. Seismological Research Letters Volume  
350 87, Number 1, January/February 2016, doi: 10.1785/0220150061

351 Lomax, A. (2000). The Orfeus Java Workshop: Distributed Computing in Earthquake  
352 Seismology. Seismological Research Letters, Volume 71, Number 5, doi:  
353 10.1785/gssrl.71.5.589.

354 Steinberg, D.-J., R.A Phinney, and A.M. Nolet (2000). The Princeton Earth Physics  
355 Project presents: Seismometers-Telescopes for the Earth's Interior. American Astronomical  
356 Society, 196th AAS Meeting, id.24.04; Bulletin of the American Astronomical Society, Vol.  
357 32, p.707 <https://ui.adsabs.harvard.edu/abs/2000AAS...196.2404S>

358 Van Wijk, K., T. Channel, K. Viskupic, and M.L. Smith (2013).  
359 Teaching Geophysics with a Vertical-Component Seismometer, Physics Teacher, 51(9), 552-  
360 554, doi: 10.1119/1.4830072

361 Virieux, J. (2000) – Educational Seismological project: EDUSEIS, Seismological  
362 Research Letters, 71(5): 530-535. doi: <https://doi.org/10.1785/gssrl.71.5.530>

363 Zollo, A., A. Bobbio, J.L. Berenguer, F. Courboux, P. Denton , G. Festa, A. Saron,  
364 S. Solarino, F. Haslinger, and D. Giardini (2014). The European Experience of Educational  
365 Seismology. In: Tong V. (eds) Geoscience Research and Outreach. Innovations in Science  
366 Education and Technology, vol 21. Springer, Dordrecht.

367

#### 368 **Mailing list addresses**

369

370 Jean-Luc Berenguer: [jean-luc.berenguer@univ-cotedazur.fr](mailto:jean-luc.berenguer@univ-cotedazur.fr)

371 Julien Balestra: [julien.balestra@univ-cotedazur.fr](mailto:julien.balestra@univ-cotedazur.fr)

372 Fabrice Jouffray: [fabrice.jouffray@univ-cotedazur.fr](mailto:fabrice.jouffray@univ-cotedazur.fr)

373 Françoise Courboux: [courboux@geoazur.unice.fr](mailto:courboux@geoazur.unice.fr)

374 Fabrice Mourau : [Fabrice-Benjami.Mourau@ac-nice.fr](mailto:Fabrice-Benjami.Mourau@ac-nice.fr)

375 Jean Virieux : [Jean.Virieux@univ-grenoble-alpes.fr](mailto:Jean.Virieux@univ-grenoble-alpes.fr)

#### 376 **Figure captions**

377



378 Figure 1: First educational seismic stations deployed at the Valbonne International School. (a)  
379 Students working on seismograms from a specific educational database. Informed consent was  
380 provided by the individuals pictured for the publication of these identifiable images. (b) Record  
381 of the Chi Chi earthquake (Taiwan, Mw 7.6), which occurred on September 20, 1999 and was  
382 recorded at the French educational CIVF seismic station. Values in abscissa are hours of the  
383 current day (UTC time, p.m.). (c) Evolution of the number of educational seismometers  
384 deployed during the past equipping phase of the French educational network, and currently with  
385 the EduMed-Obs project. Colors under the curve and corresponding colored boxes give an  
386 indication of the kind of sensors deployed during each phase. See “Data and Resources” for  
387 further details.

388

389 Figure 2: Focus on teachers’ answers to the survey. In this case, the graph shows the impact of  
390 the installation of a seismometer in a school, relative to different considerations.

391



392

393 **Figures**

394

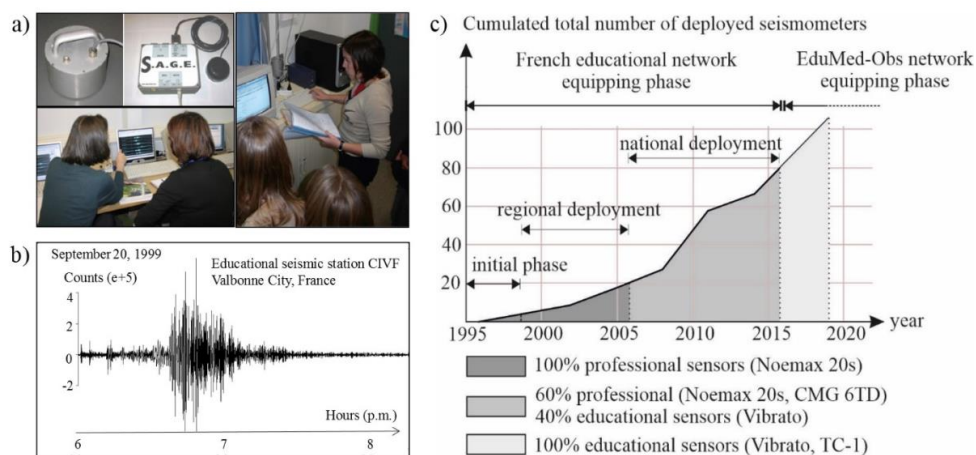

395

396 Figure 1: First educational seismic stations deployed at the Valbonne International School. (a)

397 Students working on seismograms from a specific educational database. Informed consent was

398 provided by the individuals pictured for the publication of these identifiable images. (b) Record

399 of the Chi Chi earthquake (Taiwan, Mw 7.6), which occurred on September 20, 1999 and was

400 recorded at the French educational CIVF seismic station. Values in abscissa are hours of the

401 current day (UTC time, p.m.). (c) Evolution of the number of educational seismometers

402 deployed during the past equipping phase of the French educational network, and currently with

403 the EduMed-Obs project. Colors under the curve and corresponding colored boxes give an

404 indication of the kind of sensors deployed during each phase. See “Data and Resources” for

405 further details.

406

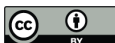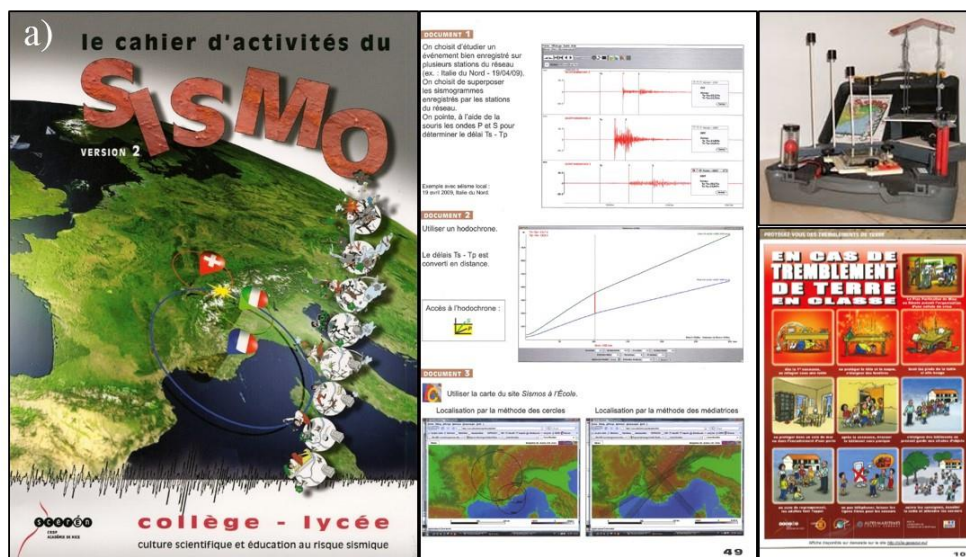

b)

How is the school seismometer the most useful ?

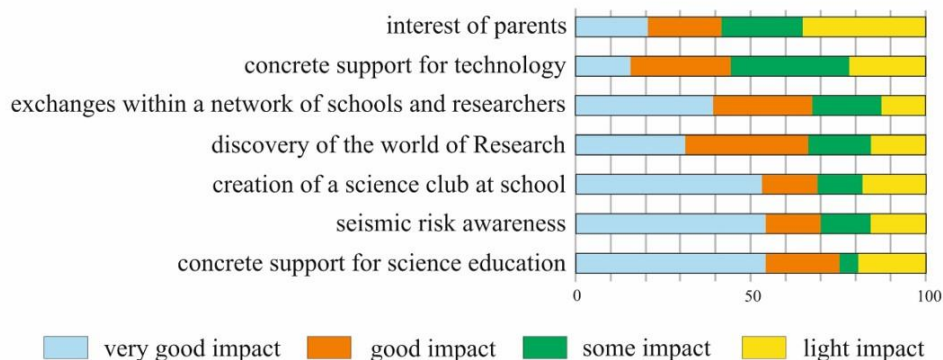

407

408 Figure 2: Pedagogical resources produced by the French educational network. (a) The “seismo”

409 exercise book and the “seismo” box used to illustrate many aspects of the seismic phenomenon.

410 (b) Focus on teachers’ answers to the survey. In this case, the graph shows the impact of the

411 installation of a seismometer in a school, relative to different considerations.
